# Supplementary material for: A highly stable and white-light-emitting Eu(iii) MOF
Source: Royal Society of Chemistry journal article supplement (doi:10.1039/c6dt03655d), 2016-01-01
Supplement: c6dt03655d1.pdf [file c6dt03655d1.pdf]

## Supporting Information

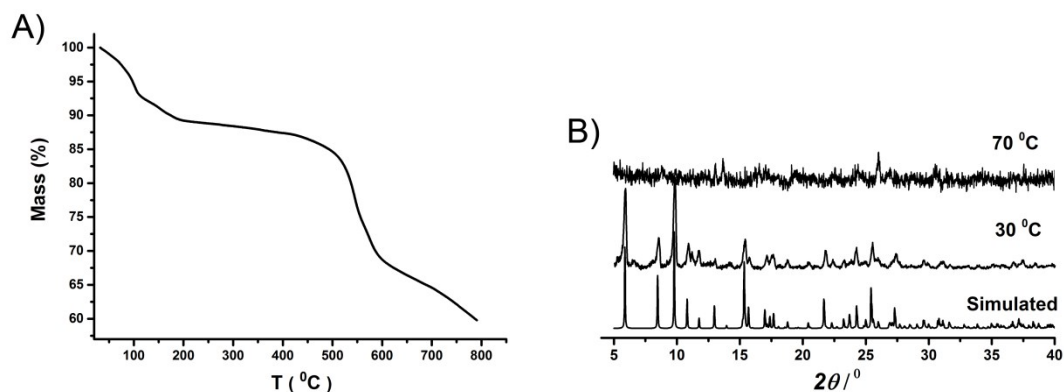

**Fig. S1** Thermogravimetric analysis (A) and temperature-dependent PXRD measurement (B) for complex **1**.

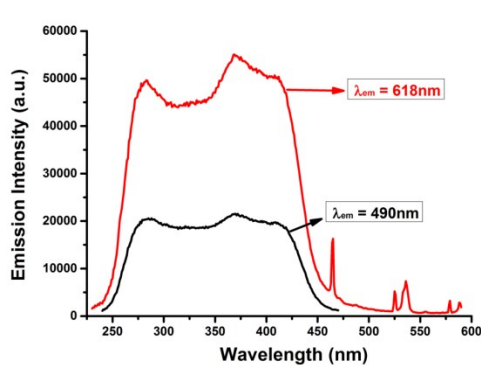

**Fig. S2** Excitation spectrum of complex **2**.

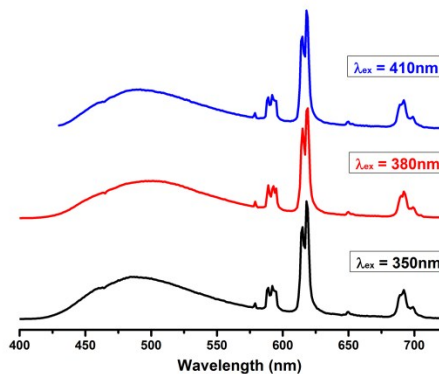

**Fig. S3** Emission spectrum of complex **2** under excitation of near-UV light.

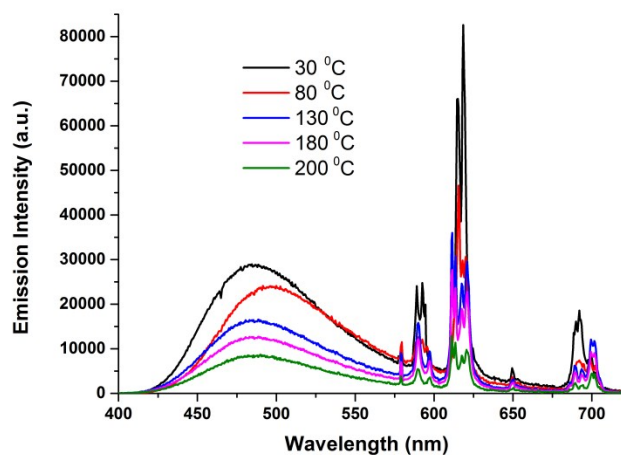

**Fig. S4** Temperature-dependent emission spectrum of complex **2** upon excitation at 380nm.
